## Relationship between natriuretic peptides and left atrial mechanics and their relation to recurrence of atrial fibrillation following catheter ablation

Olsen FJ.<sup>1</sup>; Darkner S.<sup>1</sup>; Goetze JP.<sup>2</sup>; Chen X.<sup>3</sup>; Henningsen K.<sup>1</sup>; Pehrson S.<sup>3</sup>; Svendsen JH.<sup>3</sup>; Biering-Sorensen T.<sup>1</sup>

<sup>1</sup>Dept. of Cardiology, Herlev & Gentofte Hospital, University of Copenhagen, Copenhagen, Denmark

<sup>2</sup>Rigshospitalet - Copenhagen University Hospital, Department of Clinical Biochemistry, Copenhagen, Denmark

<sup>3</sup>Rigshospitalet - Copenhagen University Hospital, Department of Cardiology, Copenhagen, Denmark

**Funding Acknowledgements:** Type of funding sources: Foundation. Main funding source(s): The Danish Heart Foundation (grant no.: 09-04-R72-A2408-22545, 10-04-R78-A2929-22588, 11-04-R84-A3230-22650, and 18-R125-A8534-22083), and the Heart Centre Research Committee at Rigshospitalet, Copenhagen.

### Background

The relationship between natriuretic peptides and atrial distension is not completely understood. Furthermore, how they can be used together clinically has not been fully explored.

### Purpose

We sought to examine their interrelationship and how they relate to atrial fibrillation (AF) recurrence following catheter ablation.

**Methods:** Patients scheduled for catheter ablation as part of a randomized controlled clinical trial were included. Patients who underwent pre-operative echocardiography and had natriuretic peptide measurements performed, specifically mid-regional proANP (MR-proANP) and N-terminal proBNP (NT-proBNP), were included in this analysis. Echocardiography included assessment of atrial distension by left atrial strain.

The outcome was AF recurrence at 6 months after a 3-month blanking period. Logistic regression was performed to assess the association between log-transformed natriuretic peptides and AF. Multivariable adjustments were made for age, gender, randomization, and LVEF.

**Results:** Out of 99 patients 44 developed AF. No differences in natriuretic peptides nor echocardiographic measures were observed between the outcome groups.

Neither MR-proANP nor NT-proBNP were univariable predictors of AF recurrence (MR-proANP: OR = 1.06 (0.99-1.14),  $p = 0.09$ , per 10% increase; NT-proBNP: OR = 1.01 (0.98-1.05),  $p = 0.38$ , per 10% increase). These findings were unchanged after multivariable adjustments. However, atrial strain significantly modified the association between MR-proANP and AF ( $p$  for interaction = 0.009) such that MR-proANP was a significant predictor of AF in patients with high atrial strain values (OR = 1.24 (1.06-1.46),  $p = 0.008$ , per 10% increase) but not in patients with low atrial strain values. Among patients with high atrial strain values, an MR-proANP > 116pmol/L was associated with a 10-fold increased risk of AF (OR = 9.78 (2.21-43.33),  $p = 0.003$ ). figure.

**Conclusion:** Atrial natriuretic peptide predicts AF recurrence in patients with preserved atrial distension. Assessing atrial distension by echocardiography may assist the clinical interpretation of atrial natriuretic peptide concentration.

### Abstract Figure.

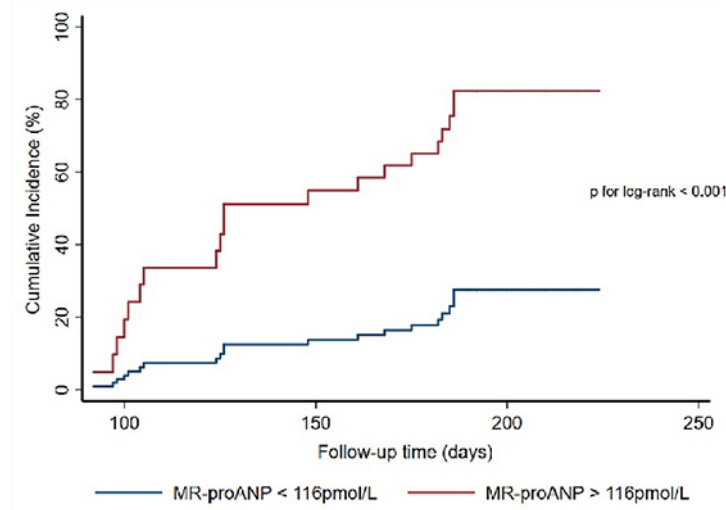

Source: http://academic.oup.com/ehjcimaging/article-pdf/22/Supplement_1/jeaa356.169/36215225/jeaa356.169.pdf
